# Supplementary material for: A PDDA functionalized nitrogen and sulphur doped graphene composite as the counter electrode for dye-sensitized solar cells
Source: Royal Society of Chemistry journal article supplement (doi:10.1039/c8nj00850g), 2018-01-01
Supplement: c8nj00850g1.pdf [file c8nj00850g1.pdf]

## PDDA FUNCTIONALIZED NITROGEN AND SULPHUR DOPED GRAPHENE COMPOSITE AS COUNTER ELECTRODE FOR DYE- SENSITIZED SOLAR CELLS

Raji Karunagaran Jhanani<sup>a, b</sup>, Janakiraman Manokaran<sup>a</sup>, Jonna Narendranath <sup>a</sup>, and Natesan Balasubramanian<sup>\*a</sup>,  
Nallamuthu Prabhu<sup>b</sup>

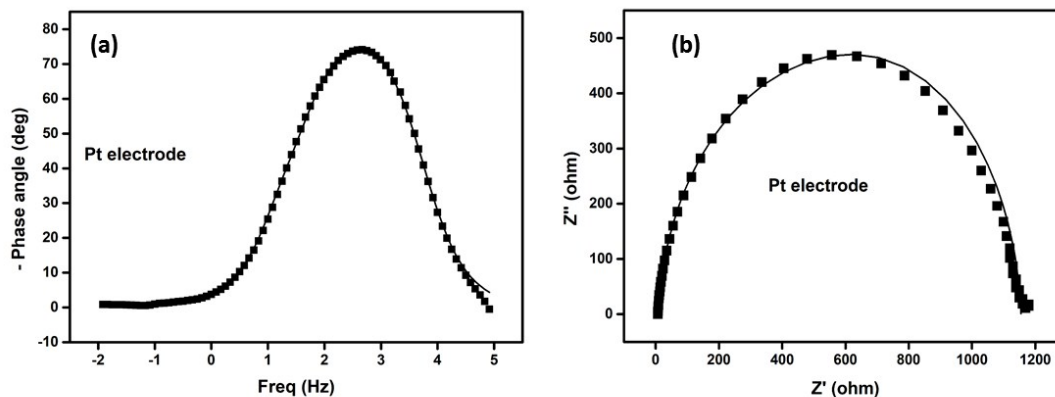

Fig. 1 Bode plots of Pt counter electrode, (inset) equivalent EIS circuit and (b) Nyquist plot of Pt counter electrodes; measured in the range between 100000 to 0.1 Hz.
